# Supplementary material for: Single-cell RNA-seq data analysis on the receptor ACE2 expression reveals the potential risk of different human organs vulnerable to 2019-nCoV infection
Source: Springer Nature journal article supplement (doi:10.1007/s11684-020-0754-0), 2020-03-12
Supplement: 11684_2020_754_MOESM1_ESM.pdf [file 11684_2020_754_MOESM1_ESM.pdf]

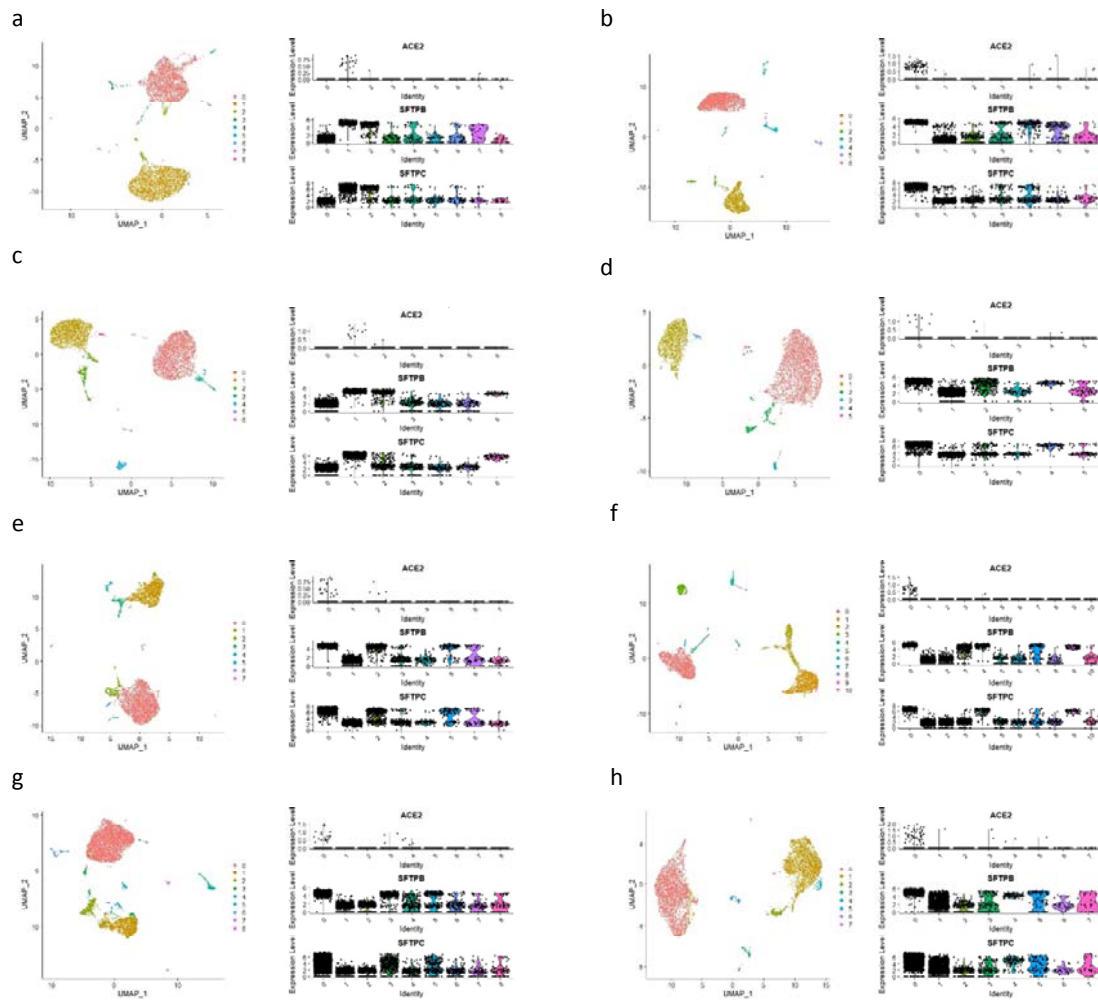

**Fig. S1** The lung scRNA-seq data analysis results of 8 donors (a-h). For each donor, the cell cluster co-expressing ACE2, SFTPB and SFTPC are identified as AT2.

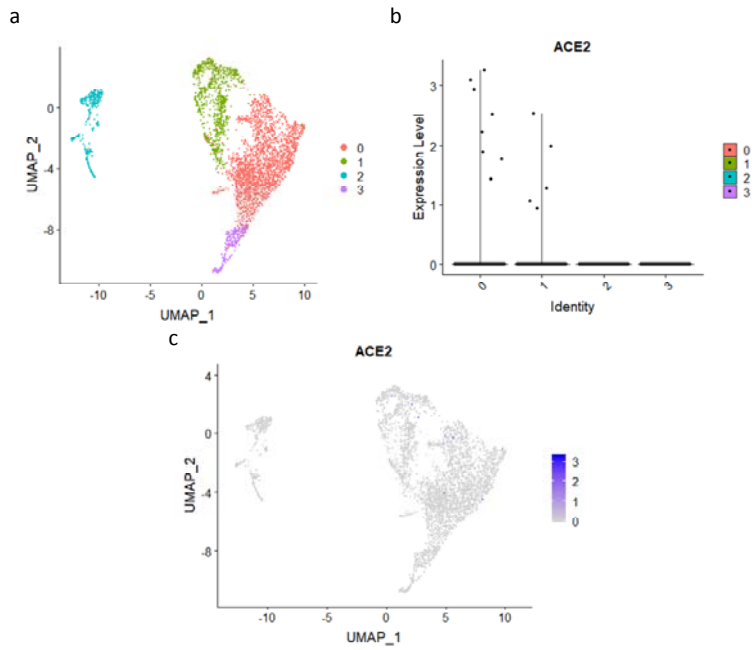

**Fig. S2** Nasal mucosa scRNA-seq data analysis showed few cells expressing ACE2. a) The cells were categorized into 4 clusters. b) Violin plot showing the ACE2 expression distribution of different cell clusters. c) The ACE2 expression distribution demonstrated in scatter plot.

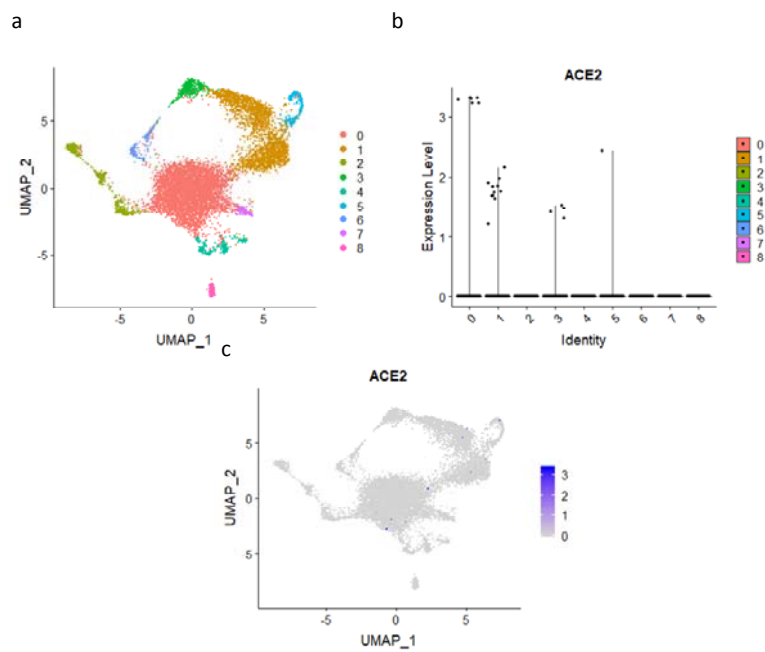

**Fig. S3** Bronchus scRNA-seq data analysis showed few cells expressing ACE2. a) The cells were categorized into 8 clusters. b) Violin plot showing the ACE2 expression distribution of different cell clusters. c) The ACE2 expression distribution demonstrated in scatter plot.

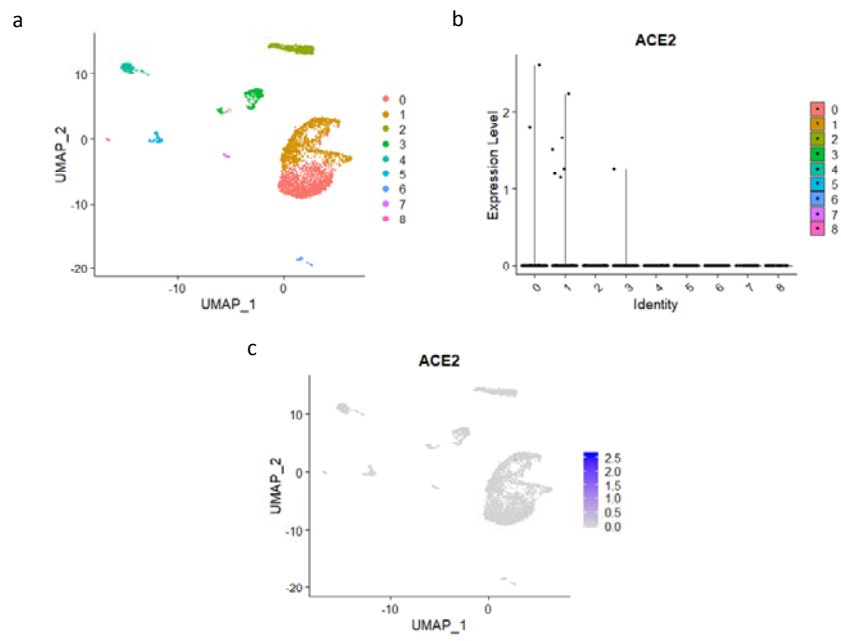

**Fig. S4** Stomach scRNA-seq data analysis showed very few cells expressing ACE2. a) The cells were categorized into 9 cell types. b) Violin plot showing the ACE2 expression distribution of different cell clusters. c) The ACE2 expression distribution demonstrated in scatter plot.

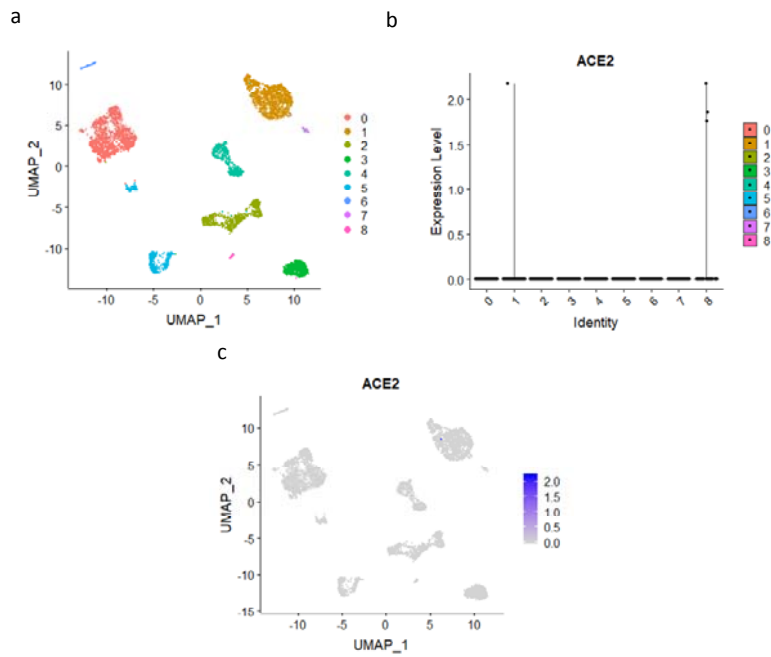

**Fig. S5** Liver scRNA-seq data analysis showed almost no cell expressing ACE2. a) The cells were categorized into 9 cell types. b) Violin plot showing the ACE2 expression distribution of different cell clusters. c) The ACE2 expression distribution demonstrated in scatter plot.
